# Supplementary material
Source: PubMed Central journal article supplement (PMC5566532)
Supplement: 10.1074_M117.780874_jbc.M117.780874-6.pdf [file 10.1074_M117.780874_jbc.M117.780874-6.pdf]

## Figure legends for supplementary data

**Figure S1.** A, Comparison of mRNA levels of AMPK  $\alpha$ 1 and  $\alpha$ 2 subtypes (n=4). B, Knockout of AMPK  $\alpha$ 1 and  $\alpha$ 2 subtype by using the CRISPR/Cas-9 genome editing technique. C, AMPK  $\alpha$ 2, but not  $\alpha$ 1, is critical for ACD of I(-) HCN cells. Cell death was measured 24 h after insulin withdrawal (n=15). ns, not significant,  $**P < 0.01$ .

**Figure S2.** A, insulin withdrawal does not deplete cellular ATP (n=?). Glucose deprivation for 5 h was included as a positive control of ATP measurement and induced substantial depletion of cellular ATP. B, CaMKK inhibitor STO-609 decreases AMPK activation. C, STO-609 attenuates cell death in I(-) HCN cells (n=?). D, AMPK  $\alpha$ 2 CA increases ACC phosphorylation. Endo, endogenous AMPK; \*, a non-specific band. ns, not significant,  $***P < 0.001$ .

**Figure S3.** Expression of phosphorylation-deficient mutants of mp62 in HCN cells (n=8).  $*P < 0.05$ ,  $**P < 0.01$ .

**Figure S4.** *In vitro* kinase assay of p62 with recombinant human AMPK composed of  $\alpha$ 2/ $\beta$ 1/ $\gamma$ 1 subunits. Human p62 wildtype, but not S293A mutant protein, was phosphorylated by recombinant AMPK.

**Figure S5.** Expression of the phosphorylation-deficient mutants of hp62-S403 and S407 restores cell death rate to a lesser extent than that of hp-62 WT in I(-) Sh-rp62 KD HCN cells (n=5).  $*P < 0.05$ .

**Figure S6.** Expression of hp62-S294A has no effect on STS (0.25 nM)-induced apoptotic cell death. Sh-rp62 KD HCN cells were transfected with the plasmids encoding hp62-WT or hp62-S294A (n=13). ns, not significant,  $***P < 0.001$ .

**Supplemental movies for GFP-p62 in I(+) (S1-S2) and I(-) (S3-S5) HCN cells.**

**A**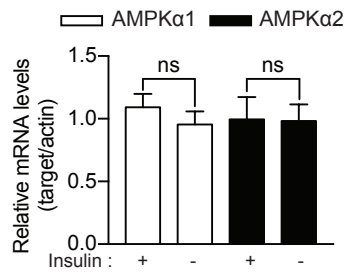**B**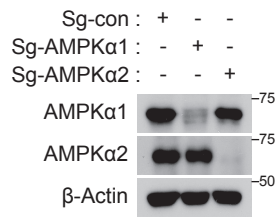**C**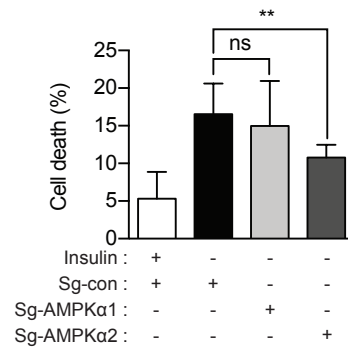

Figure S1

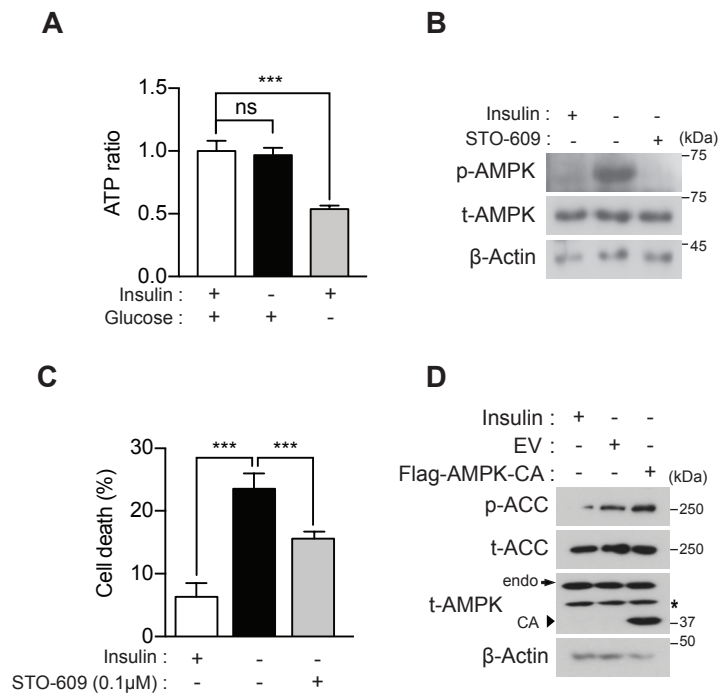

Figure S2

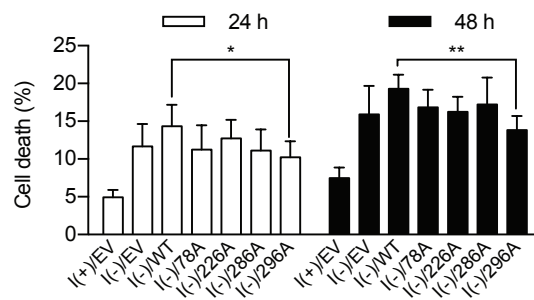

Figure S3

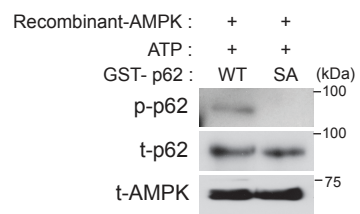

Figure S4

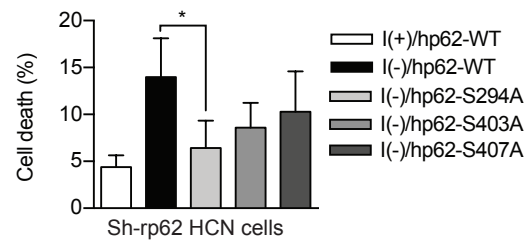

Figure S5

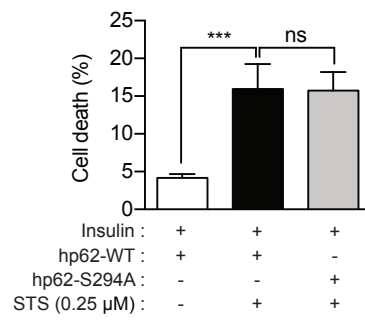

Figure S6
